# Supplementary material for: Kinetics of crystal growth of nanogoethite in aqueous solutions containing nitrate and sulfate anions
Source: Royal Society of Chemistry journal article supplement (doi:10.1039/c3ce41685b), 2013-10-01
Supplement: c3ce41685b.pdf [file c3ce41685b.pdf]

## Electronic Supplementary Information (ESI)

### Kinetics of crystal growth of nanogoethite in aqueous solutions containing nitrate and sulfate anions <sup>+</sup>

Thien An Vu <sup>abc</sup>, Mary M. Reagan <sup>abd</sup>, Dongsheng Li <sup>e</sup>, Benjamin Legg <sup>a</sup>, James J. De Yoreo <sup>e</sup>, Jillian F. Banfield <sup>a</sup>, and Hengzhong Zhang <sup>\*a</sup>

#### 1. Fitted kinetic constants

Table S1. Fitted kinetic constants

| T (°C) | OA in nitrate system   |      | OA in sulfate system   |      |
|--------|------------------------|------|------------------------|------|
|        | $k$ (h <sup>-1</sup> ) | $m$  | $k$ (h <sup>-1</sup> ) | $m$  |
| 25     | 0.156                  | 15.3 | 0.059                  | 19.2 |
| 50     | 0.372                  | 20.0 | 0.271                  | 24.5 |
| 60     | 0.490                  | 21.2 | 0.492                  | 24.8 |
| 70     | 0.488                  | 21.7 | 0.592                  | 25.4 |

## 2. TEM images showing aggregation of goethite nanorods

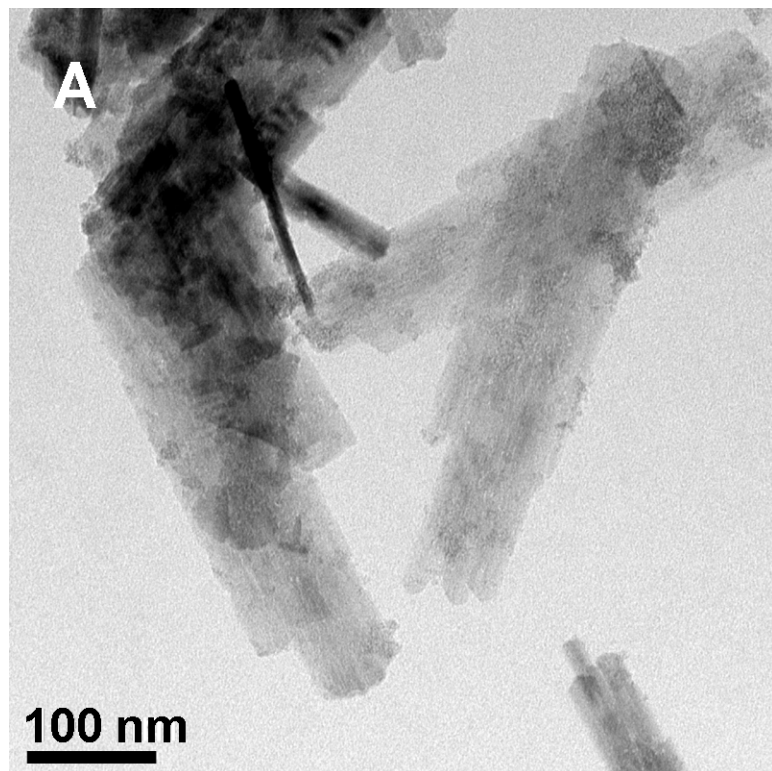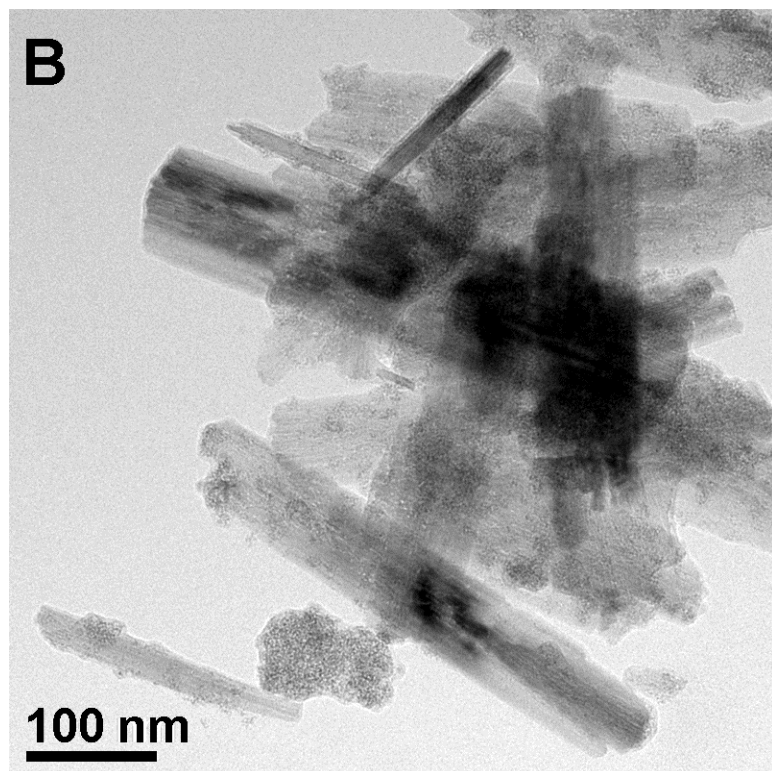

**Fig. S1** TEM images showing goethite nanorods are aggregated in samples aged at 70 °C for 4 h in the nitrate system (A), and aged at 60 °C for 5 h in the sulfate system (B). Average particle size by XRD analyses is 33 nm for (A) and 36 nm for (B).
